# Supplementary material
Source: ML conference proceedings conference paper supplement (https://proceedings.neurips.cc/paper_files/paper/2014/hash/215a71a12769b056c3c32e7299f1c5ed-Abstract.html)
Supplement: Supplementary file [file 215a71a12769b056c3c32e7299f1c5ed-Supplemental.zip]

# 1 Deconvolution of High Dimensional Mixtures via Boosting, with Application to Diffusion-Weighted MRI of Human Brain: Supplemental Material

## 1.1 Definitions

In this paper, we restrict our attention to the use of squared-error loss; resulting in penalized least-squares problem

$$\text{minimize}_{\hat{K}, \hat{w}, \hat{\theta}} \left\| y_i - \sum_{k=1}^{\hat{K}} \hat{w}_k f_{\hat{\theta}_k}(x_i) \right\|^2 + \lambda P_{\theta}(w) \quad (1)$$

where  $P_{\theta}(w)$  is a *convex* penalty function of  $(\theta, w)$ .

Recall that one can define *convex functions* on  $(w, \theta) \in \bigcup_{K=1}^{\infty} [0, \infty)^K \times \Theta^K$  in the following manner. First, define a *sum* of  $w^i = (w_i^1, \dots, w_i^{K^i})$ ,  $\theta^i = (\theta_1^i, \dots, \theta_{K^i}^i)$  for  $i = 1, \dots, L$  by

$$\sum_{i=1}^L (w^i, \theta^i) = (w, \theta) \quad (2)$$

$$w = (w_1^1, \dots, w_{K^1}^1, w_1^2, \dots, w_{K^2}^2, \dots, w_1^L, \dots, w_{K^L}^L) \quad (3)$$

$$\theta = (\theta_1^1, \dots, \theta_{K^1}^1, \theta_1^2, \dots, \theta_{K^2}^2, \dots, \theta_1^L, \dots, \theta_{K^L}^L) \quad (4)$$

and *scalar product* by

$$\alpha(w^1, \theta^1) = (w, \theta^1) \quad (5)$$

$$w = (\alpha w_1^1, \dots, \alpha w_{K^1}^1) \quad (6)$$

for  $\alpha \geq 0$ . Then a *convex function*  $G((w, \theta))$  satisfies

$$G\left(\sum_{i=1}^L \alpha_i (w^i, \theta^i)\right) \leq \sum_{i=1}^L \alpha_i G((w^i, \theta^i))$$

For our convergence results to hold, we require an oracle function  $\tau : \mathbb{R}^n \rightarrow \Theta$  which satisfies

$$\left\langle \tilde{r}, \frac{\tilde{f}_{\tau(\tilde{r})}}{\|\tilde{f}_{\tau(\tilde{r})}\|} \right\rangle \geq \alpha \rho(\tilde{r}) \quad (7)$$

where

$$\rho(\tilde{r}) = \sup_{\theta \in \Theta} \left\langle \tilde{r}, \frac{\tilde{f}_{\theta}}{\|\tilde{f}_{\theta}\|} \right\rangle \quad (8)$$

for some fixed  $\alpha > 0$ . Our algorithm will also work with a stochastic oracle that satisfies (7) with fixed probability  $p > 0$  for every input  $r$ .

## 1.2 Regularization

(An expanded version of the section 2.1 of the main paper.)

A variety of  $L_1$ -norm based penalty functions can be accommodated by EBP, by using a modified input  $\tilde{y}$  and kernel function family  $\tilde{f}_{\theta}$ , so that

$$\text{argmin}_{K, w, \theta} \left\| \tilde{y} - \sum_{i=1}^K \tilde{f}_{\theta} \right\|^2 = \text{argmin}_{K, w, \theta} \left\| y - \sum_{i=1}^K \vec{f}_{\theta} \right\|^2 + \lambda P_{\theta}(w)$$

We will use our modified  $L_2$ Boost algorithm to produce a path of solutions for objective function on the left side, which results in a solution path for the penalized objective function (1).

Firstly, it is possible to embed the penalty  $P_\theta(w) = \|w\|_1^2$  in the optimization problem (1). One can show that solutions obtained by using the penalty function  $P_\theta(w) = \|w\|_1^2$  have a one-to-one correspondence with solutions of obtained using the usual  $L_1$  penalty  $\|w\|_1$ . The penalty  $\|w\|_1^2$  is implemented by calling EBP on modified input  $\tilde{y} = \begin{pmatrix} y \\ 0 \end{pmatrix}$  and using modified kernel vectors  $\tilde{f}_\theta = \begin{pmatrix} f_\theta \\ \sqrt{\lambda} \end{pmatrix}$ .

While the  $L_1$  penalization imposes the same penalty for every  $\theta$ , a useful alternative can be useful to impose a “roughness” penalty  $g(\theta)$  on the kernel functions, so that smoother kernel functions are preferred. For example, one might consider the first derivative penalty

$$g(\theta) = \int_x \|\nabla_x f_\theta(x)\|^2 dx$$

or an approximation

$$g(\theta) = \frac{1}{n} \sum_{i=1}^n \|\nabla_x f_\theta(x_i)\|^2$$

The mixture model can be fit using the penalty  $P_\theta(w) = \left\| \sum_{i=1}^K g(\theta_i) w_i \right\|^2$ . This is done by setting  $\tilde{y} = \begin{pmatrix} y \\ 0 \end{pmatrix}$  and  $\tilde{f}_\theta = \begin{pmatrix} f_\theta \\ \sqrt{\lambda} g(\theta) \end{pmatrix}$ .

For *unweighted* mixture problems, one can enforce the constraint  $\|w\|_1 = 1$  by means of the penalty  $P_\theta(w) = (1 - \|w\|_1)^2$ . This is implemented using  $\tilde{y} = \begin{pmatrix} y \\ \sqrt{\lambda} \end{pmatrix}$ ,  $\tilde{f}_\theta = \begin{pmatrix} f_\theta \\ \sqrt{\lambda} \end{pmatrix}$ . As  $\lambda \rightarrow \infty$ , one obtains a hard constraint.

For all of the above penalties, the sample size in the transformed problem  $\tilde{n}$ , is one plus the sample size of the original problem,  $n$ .

Finally, *nonnegative* kernel functions satisfying  $f_\theta(x) \geq 0$  satisfy a *self-regularizing* property [Slawski], so that additional penalization is optional. If no penalization is added, we take  $\tilde{y} = y$  and  $\tilde{f}_\theta = f_\theta$ , so  $\tilde{n} = n$ . For our fast convergence results, *either* nonnegativity of the kernel function *or* imposition of one of the above penalties will suffice.

In the following sections, define

$$\tilde{F}_\theta = \begin{bmatrix} f_{\theta_1}, \dots, f_{\theta_K} \end{bmatrix} \quad (9)$$

### 1.3 EBP Pseudocode

Here we present our elastic basis pursuit algorithm for producing a path of solutions  $(w^{(1)}, \theta^{(1)}), \dots$  which progressively minimize

$$\text{minimize}_{K, w > 0, \theta} \left\| \tilde{y} - \sum_{i=1}^K w_i \tilde{f}_{\theta_i} \right\|^2 \quad (10)$$

#### Inputs

- Input vector  $\tilde{y} \in \mathbb{R}^{\tilde{n}}$ .
- Validation function  $\text{Err}_{val}(w, \theta)$  which uses a validation set to estimate the prediction error of the model  $(w, \theta)$ ,
- Oracle  $\tau : \mathbb{R}^{\tilde{n}} \rightarrow \Theta$  satisfying (7)
- Function  $\tilde{f}_\theta : \Theta \rightarrow \mathbb{R}^{\tilde{n}}$  mapping parameters to regressors
- Initial estimate  $(w^{(0)}, \theta^{(0)})$  and residual  $\tilde{r}^{(0)}$  obtained by using NNLS to solve (10) and then discarding any zero weights and corresponding parameters. Let  $K^{(0)}$  be the number of components in  $w^{(0)}$ .

- Maximum number of iterations,  $M$ .

#### Elastic Basis Pursuit

```

1: for  $m = 1, \dots, M$  do
2:    $\theta^{(m-\frac{1}{2})} \leftarrow (\tau(\tilde{r}^{(m-1)}), \theta_1^{(m-1)}, \dots, \theta_{K^{(m-1)}}^{(m-1)})$ 
3:    $K^{(m-\frac{1}{2})} \leftarrow K^{(m-1)} + 1$ 
4:   Using NNLS, set  $\beta^{(m)} \leftarrow \operatorname{argmin}_{\beta > 0} \|\tilde{y} - \tilde{F}_{\theta^{(m-\frac{1}{2})}} \beta\|^2$  and  $\tilde{r}^{(m)} \leftarrow \tilde{y} - \tilde{F}_{\theta^{(m-\frac{1}{2})}} \beta^{(m)}$ 
5:    $K^{(m)} \leftarrow \|\beta^{(m)}\|_0$ 
6:    $\{i_1^{(m)}, \dots, i_{K^{(m)}}^{(m)}\} \leftarrow \{i \in \{1, \dots, K^{(m-\frac{1}{2})}\} : \beta_i^{(m)} \neq 0\}$ 
7:    $\theta^{(m)} \leftarrow \left( \theta_{i_1^{(m)}}^{(m-1)}, \dots, \theta_{i_{K^{(m)}}^{(m)}}^{(m-1)} \right)$ 
8:    $w^{(m)} \leftarrow \left( w_{i_1^{(m)}}^{(m-1)}, \dots, w_{i_{K^{(m)}}^{(m)}}^{(m-1)} \right)$ 
9:    $\operatorname{Err}_{val}^{(m)} \leftarrow \operatorname{Err}_{val}(w^{(m)}, \theta^{(m)})$ 
10: end for

```

Step 2 calls the oracle to find  $\theta_{new} = \tau(\tilde{r})$ , and adds  $\theta_{new}$  to the active set  $\theta$ . Step 4 refits the weights  $w$  and updates the residual  $\tilde{r}$ . Step 7 prunes the active set  $\theta$  by removing any parameter  $\theta$  whose weight is zero. This ensures that the active set  $\theta$  remains sparse in each iteration. Step 9 computes an estimated prediction error at each iteration, via an independent validation set. Optionally, one can add a command to stop the algorithm early when the prediction error begins to climb (indicating overfitting).

#### 1.4 Proofs of Convergence

(An expanded version of the section 2.3 of the main paper.)

Proposition 1 establishes regularization, smoothness and compactness assumptions which ensure the existence of a maximally saturated model  $(w^*, \theta^*)$  of size  $K^* \leq \tilde{n}$ . Indeed, if a saturated model exists, then a saturated model with at most  $\tilde{n}$  terms also exists: this is a consequence of the properties of nonnegative least squares [Lawson]. This fact is stated in Lemma 1.

**Lemma 1.** Fix  $\tilde{y} \in \mathbb{R}^{\tilde{n}}$  function  $\tilde{f} \rightarrow \mathbb{R}^{\tilde{n}}$ . For any positive integer  $K \geq \tilde{n}$ , and for any  $w \in [0, \infty)^K$ ,  $\theta \in \Theta^K$ , there exists  $\tilde{w}, \tilde{\theta} \in \Theta^{\tilde{n}}$  such that

$$\|\tilde{y} - \tilde{F}_{\tilde{\theta}} \tilde{w}\|^2 \leq \|\tilde{y} - \tilde{F}_{\theta} w\|^2$$

**Proof.** By [Lawson], we can find  $\beta = \operatorname{argmin} \|\tilde{y} - \tilde{F}_{\theta} \beta\|^2$  with  $\|\beta\|_0 \leq \tilde{n}$ . Clearly,

$$\|\tilde{y} - \tilde{F}_{\theta} \beta\|^2 \leq \|\tilde{y} - \tilde{F}_{\theta} w\|^2$$

Let  $s = \|\beta\|_0$  and let

$$\{i_1, \dots, i_s\} = \{i \in \{1, \dots, K\} : \beta_i > 0\}$$

If  $s \leq \tilde{n}$ , choose  $i_s, \dots, i_{\tilde{n}}$  so that  $\{i_1, \dots, i_{\tilde{n}}\}$  has  $\tilde{n}$  unique elements. Define  $\tilde{w} = (\beta_{i_1}, \dots, \beta_{i_{\tilde{n}}})$  and  $\tilde{\theta} = (\theta_{i_1}, \dots, \theta_{i_{\tilde{n}}})$ . Then

$$\|\tilde{y} - \tilde{F}_{\tilde{\theta}} \tilde{w}\|^2 = \|\tilde{y} - \tilde{F}_{\theta} \beta\|^2 \leq \|\tilde{y} - \tilde{F}_{\theta} w\|^2$$

□

Having proved lemma 1, we have reduced the problem of showing the existence of a maximally saturated model to that of showing the existence of a maximally saturated model with  $\tilde{n}$  components. However, we will need additional regularization assumptions.

**Proposition 1.** Let  $\tilde{y}$  be a vector in  $\mathbb{R}^{\tilde{n}}$ , let  $\Theta$  be a compact set in  $\mathbb{R}^D$ , and let  $\tilde{f}_{\theta} : \Theta \rightarrow \mathbb{R}^{\tilde{n}}$  be a continuous vector-valued function with respect to  $\theta$ . Furthermore, assume that  $\tilde{f}_{\theta}$  is adequately

regularized in the sense that there exists  $\epsilon > 0$ ,  $v \in \mathbb{R}^n$  such that

$$\inf_{\theta \in \Theta} \langle v, \tilde{f}_\theta \rangle \geq \epsilon \quad (11)$$

Then there exists a nonnegative integer  $K^* \leq \tilde{n}$  and  $w^* = (w_1^*, \dots, w_{K^*}^*)$  and  $\theta^* = (\theta_1^*, \dots, \theta_{K^*}^*)$ , with  $w^* \in [0, \infty)^{\tilde{n}}$  and  $\theta^* \in \Theta^{\tilde{n}}$  such that the residual  $\tilde{r}^*$ , defined by

$$\tilde{r}^* = \tilde{y} - \tilde{F}_{\theta^*} w^*$$

satisfies

$$\|\tilde{r}^*\|^2 = \inf_{w, \theta, K \in \mathbb{N}} \left\| \tilde{y} - \sum_{i=1}^K w_i \tilde{f}_{\theta_i} \right\|^2 \quad (12)$$

The regularization condition (11) is satisfied either when  $L_1$  regularization is imposed, or the kernels satisfy a positivity condition, i.e.  $\inf_{\theta \in \Theta} f_\theta(x_i) \geq 0$  for  $i = 1, \dots, n$  and  $\inf_{\theta \in \Theta} \|\vec{f}_\theta\| > 0$ . Under  $L_1$  regularization,  $P_\theta(w) = \|w\|_1^2$ , one can use  $v = (0, 0, \dots, 0, 1)$ . Given positivity, one can use  $v = (1, 1, \dots, 1)$ .

Before proving proposition 1, we will first prove a lemma stating that the regularization condition implies that any  $w, \theta$  for which  $\|w\|_1$  is large, also has a large residual.

**Lemma 2.** Fix  $\tilde{y} \in \mathbb{R}^{\tilde{n}}$  function  $\tilde{f} \rightarrow \mathbb{R}^{\tilde{n}}$ . Furthermore, assume that the problem is adequately regularized in the sense that there exist  $\epsilon > 0$ ,  $v \in \mathbb{R}^n$  such that (11) holds. Define

$$U = \frac{\|\tilde{y}\| \|v\| + \langle v, \tilde{y} \rangle}{\epsilon} \quad (13)$$

Then for all  $(w, \theta) \in [0, \infty)^{\tilde{n}} \times \Theta^{\tilde{n}}$  with  $\|w\|_1 > U$ ,

$$\left\| \tilde{y} - \tilde{F}_\theta w \right\|^2 \geq \|\tilde{y}\|^2$$

**Proof.** Take  $(w, \theta) \in [0, \infty)^{\tilde{n}} \times \Theta^{\tilde{n}}$  with  $\|w\|_1 > U$ . Then

$$\begin{aligned} \langle v, \tilde{F}_\theta w - \tilde{y} \rangle &= -\langle v, \tilde{y} \rangle + \sum_{i=1}^{\tilde{n}} \langle v, \hat{f}_{\theta_i} \rangle w_i \\ &\geq -\langle v, \tilde{y} \rangle + \sum_{i=1}^{\tilde{n}} \epsilon w_i \\ &\geq -\langle v, \tilde{y} \rangle + U\epsilon \end{aligned}$$

But by the Cauchy-Schwarz inequality

$$\left\| \tilde{y} - \tilde{F}_\theta w \right\|^2 \geq \frac{\langle v, \tilde{F}_\theta w - \tilde{y} \rangle^2}{\|v\|^2}$$

which, by our first result, is bounded below by

$$\geq \frac{(U\epsilon - \langle v, \tilde{y} \rangle)^2}{\|v\|^2}$$

Now applying (13),

$$\geq \|\tilde{y}\|^2$$

which completes the proof.  $\square$ .

Having proved Lemma 2, we now know that any model which comes close to minimizing (10) must have bounded  $L_1$  norm. This, in conjunction with compactness of the parameter space and continuity of  $\tilde{f}_\theta$ , allows us to complete the proof of proposition 1, which establishes the existence of a model which minimizes (10).

**Proof of proposition 1.** From Lemma 1, there exists a sequence of models in  $(0, \infty]^{\tilde{n}} \times \Theta^{\tilde{n}}$ ,  $(w^{[1]}, \theta^{[1]}), \dots$  so that

$$\lim_{m \rightarrow \infty} \|\tilde{r}^{[m]}\|^2 = \inf_{w, \theta, K \in \mathbb{N}} \left\| \tilde{y} - \sum_{i=1}^K w_i \tilde{f}_{\theta_i} \right\|^2$$

where

$$\tilde{r}^{[m]} = \tilde{y} - \tilde{F}_{\theta^{[m]}} w^{[m]}$$

Let  $U$  be as defined in Lemma 2, and choose  $j \in \mathbb{R}$  so that for all  $m \geq j$ ,  $\|\tilde{r}^{[m]}\|^2 < \|\tilde{y}\|^2$ . Then by Lemma 2, for all  $m > j$ ,  $w^{[m]} \in [0, U]^{\tilde{n}}$ . Since  $\Theta$  is compact, so is  $[0, U]^{\tilde{n}} \times \Theta^{\tilde{n}}$ . Hence  $\{(w^{[m]}, \theta^{[m]})\}_{m=j}^{\infty}$  has a convergent subsequence with limiting point  $w^{\infty}, \theta^{\infty}$ . By the continuity of  $\tilde{f}_{\theta}$ ,

$$\left\| \tilde{y} - \tilde{F}_{\theta^{\infty}} w^{\infty} \right\|^2 = \inf_{w, \theta, K \in \mathbb{N}} \left\| \tilde{y} - \sum_{i=1}^K w_i \tilde{f}_{\theta_i} \right\|^2$$

Taking  $K^* = \|w^{\infty}\|_0$ , and  $\{i_1, \dots, i_{K^*}\} = \{i \in \{1, \dots, \tilde{n}\} : w_i^{\infty} > 0\}$ , define  $w^* = (w_{i_1}^{\infty}, \dots, w_{i_{K^*}}^{\infty})$  and  $\theta^* = (\theta_{i_1}^{\infty}, \dots, \theta_{i_{K^*}}^{\infty})$ . Then

$$\|\tilde{r}^*\|^2 = \left\| \tilde{y} - \tilde{F}_{\theta^*} w^* \right\|^2 = \left\| \tilde{y} - \tilde{F}_{\theta^{\infty}} w^{\infty} \right\|^2 = \inf_{w, \theta, K \in \mathbb{N}} \left\| \tilde{y} - \sum_{i=1}^K w_i \tilde{f}_{\theta_i} \right\|^2$$

as desired.  $\square$

The existence of such a saturated model  $(w^*, \theta^*)$ , in conjunction with existence of the oracle  $\tau$ , enables us to state fixed-iteration guarantees on the precision of EBP, which implies asymptotic convergence to the global optimum.

To do so, recall the definition of the maximum correlation function  $\rho$  (8), and define the quantity  $\rho^{(m)} = \rho(r^{(m)})$ . Proposition 2 uses the fact that the residuals  $\tilde{r}^{(m)}$  are orthogonal to  $\tilde{F}^{(m)}$ , thanks to the NNLS fitting procedure in step 2. This allows us to bound the objective function gap in terms of  $\rho^{(m)}$ . Proposition 3 uses properties of the oracle  $\tau$  to lower bound the progress per iteration in terms of  $\rho^{(m)}$ .

**Proposition 2** Assume the conditions of Proposition 1. Take  $w^*, \theta^*$  satisfying (12). Then defining

$$B^* = 2 \sum_{i=1}^{K^*} w_i^* \|\tilde{f}_{\theta_i^*}\| \quad (14)$$

the  $m$ th residual of the EBP algorithm  $\tilde{r}^{(m)}$  can be bounded in size by

$$\|\tilde{r}^{(m)}\|^2 \leq \|\tilde{r}^*\|^2 + B^* \rho^{(m)}$$

**Proof.** Define  $h^{(m)} : \mathbb{R}^{K^{(m)}} \times \mathbb{R}^{K^*} \rightarrow \mathbb{R}$  by

$$h^{(m)}(a, b) = \left\| \tilde{r}^{(m)} - \sum_{i=1}^{K^{(m)}} a_i \tilde{f}_{\theta_i^{(m)}} - \sum_{i=1}^{K^*} b_i \tilde{f}_{\theta_i^*} \right\|^2$$

Since  $h$  is a squared norm of a affine transformation of  $(a, b)$ ,  $h$  is convex in  $(a, b)$ . Also check that  $h^{(m)}(0, 0) = \|\tilde{r}^{(m)}\|^2$  and  $h^{(m)}(-w^{(m)}, w^*) = \|\tilde{r}^*\|^2$ .

Since  $\tilde{r}^{(m)}$  is the least squares residual of regressing  $\tilde{y}$  on  $\tilde{F}^{(m)}$ , we have

$$\langle \tilde{r}, \tilde{f}_{\theta_i^{(m)}} \rangle = 0$$

for  $i = 1, \dots, K^{(m)}$ .

Therefore,

$$\frac{\partial h^{(m)}}{\partial a_i}(0, 0) = -2 \langle \tilde{r}, \tilde{f}_{\theta_i^{(m)}} \rangle = 0$$

Meanwhile,

$$\frac{\partial h^{(m)}}{b_i}(0,0) = -2\langle \tilde{r}^{(m)}, \tilde{f}_{\theta_i^*} \rangle \geq -2\rho^{(m)} \|\tilde{f}_{\theta_i^*}\|$$

for  $i = 1, \dots, K^*$  by definition of  $\rho^{(m)}$ . Now due to the convexity of  $h$ , we have

$$\|\tilde{r}^*\|^2 = h(-w^{(m)}, w^*) \quad (15)$$

$$\geq h(0,0) - w^{(m)} \nabla_a h(0,0) + w^* \nabla_b h(0,0) \quad (16)$$

$$= h(0,0) + w^* \nabla_b h(0,0) \quad (17)$$

$$= h(0,0) + \sum_{i=1}^{K^*} w_i^* \frac{\partial h}{b_i}(0,0) \quad (18)$$

$$\geq h(0,0) + \sum_{i=1}^{K^*} w_i^* (-2\rho^{(m)} \|\tilde{f}_{\theta_i^*}\|) \quad (19)$$

$$= h(0,0) - 2\rho^{(m)} \sum_{i=1}^{K^*} w_i^* \|\tilde{f}_{\theta_i^*}\| \quad (20)$$

$$= \|\tilde{r}^{(m)}\|^2 - B^* \rho^{(m)} \quad (21)$$

as desired.  $\square$ .

Proposition 3 is mainly a consequence of the fact that in a linearly constrained regression problem, adding a new variable to the regression is at least as good as fitting that variable by itself to the residual.

**Proposition 3** *Assume the conditions of Proposition 1. Then*

$$\|\tilde{r}^{(m)}\|^2 - \|\tilde{r}^{(m+1)}\|^2 \geq (\alpha\rho^{(m)})^2$$

which also implies that the sequence  $\|\tilde{r}^{(0)}\|^2, \dots$  is decreasing.

**Proof.**

We have

$$\|\tilde{r}^{(m+1)}\|^2 = \min_{\beta > 0} \|\tilde{y} - \tilde{F}_{\theta^{(m+\frac{1}{2})}} \beta\|^2 \quad (22)$$

$$\leq \left\| \tilde{y} - \tilde{F}_{\theta^{(m)}} w^{(m)} - \tilde{f}_{\theta_1^{(m+\frac{1}{2})}} \frac{\langle \tilde{f}_{\theta_1^{(m+\frac{1}{2})}}, \tilde{r}^{(m)} \rangle}{\|\tilde{f}_{\theta_1^{(m+\frac{1}{2})}\|^2}} \right\|^2 \quad (23)$$

$$= \left\| \tilde{r}^{(m)} - \tilde{f}_{\theta_1^{(m+\frac{1}{2})}} \frac{\langle \tilde{f}_{\theta_1^{(m+\frac{1}{2})}}, \tilde{r}^{(m)} \rangle}{\|\tilde{f}_{\theta_1^{(m+\frac{1}{2})}\|^2}} \right\|^2 \quad (24)$$

$$= \|\tilde{r}^{(m)}\|^2 - \left\| \frac{\tilde{f}_{\theta_1^{(m+\frac{1}{2})}}}{\|\tilde{f}_{\theta_1^{(m+\frac{1}{2})}\|} \frac{\langle \tilde{f}_{\theta_1^{(m+\frac{1}{2})}}, \tilde{r}^{(m)} \rangle}{\|\tilde{f}_{\theta_1^{(m+\frac{1}{2})}\|}} \right\|^2 \quad (25)$$

$$= \|\tilde{r}^{(m)}\|^2 - \left( \frac{\langle \tilde{f}_{\theta_1^{(m+\frac{1}{2})}}, \tilde{r}^{(m)} \rangle}{\|\tilde{f}_{\theta_1^{(m+\frac{1}{2})}\|}} \right)^2 \quad (26)$$

$$\leq \|\tilde{r}^{(m)}\|^2 - (\alpha\rho^{(m)})^2 \quad (27)$$

Here, (23) follows from the fact that  $\tilde{F}_{\theta^{(m+\frac{1}{2})}} = \left[ \tilde{f}_{\theta_1^{(m+\frac{1}{2})}} \tilde{F}_{\theta^{(m)}} \right]$  and (24) follows from the fact that  $\tilde{r}^{(m)} = \tilde{y} - \tilde{F}_{\theta^{(m)}} w^{(m)}$ . Next, (25) is obtained by an application of the Pythagorean theorem, and (27) by applying the definitions of  $\rho^{(m)}$  and the condition (7) on  $\tau$ .  $\square$

Combining Propositions 2 and 3 yields our main result for the non-asymptotic convergence rate.

**Proposition 4** *Assume the conditions of Proposition 1. Then for all  $m > 0$ ,*

$$\|\tilde{r}^{(m)}\|^2 - \|\tilde{r}^*\|^2 \leq \frac{B_{\min} \sqrt{\|\tilde{r}^{(0)}\|^2 - \|\tilde{r}^*\|^2}}{\alpha} \frac{1}{\sqrt{m}}$$

where

$$B_{\min} = \inf_{w^*, \theta^*} B^*$$

for  $B^*$  defined in (14)

**Proof.** Take  $(w^*, \theta^*)$  satisfying (12), and define  $B^*$  as in (14). Define  $g_i = \|\tilde{r}^{(i)}\|^2 - \|\tilde{r}^*\|^2$  for  $i = 0, \dots$  and fix  $m \in \mathbb{N}$ . By Proposition 2,

$$g_m = \|\tilde{r}^{(m)}\|^2 - \|\tilde{r}^*\|^2 \leq B^* \rho^{(m)}$$

By Proposition 3,  $g_0 \geq g_1 \geq \dots$ , so that for all  $0 \leq i \leq m$ ,

$$\rho_{(i)} \geq \frac{g_i}{B^*} \geq \frac{g_m}{B^*} \quad (28)$$

Now observe that

$$\begin{aligned} g_0 &= \|\tilde{r}^{(0)}\|^2 - \|\tilde{r}^*\|^2 \\ &= \|\tilde{r}^{(0)}\|^2 - \|\tilde{r}^{(m)}\|^2 + \|\tilde{r}^{(m)}\|^2 - \|\tilde{r}^*\|^2 \\ &= \|\tilde{r}^{(0)}\|^2 - \|\tilde{r}^{(m)}\|^2 + g_m \\ &= g_m + \sum_{i=1}^{m-1} \|\tilde{r}^{(i)}\|^2 - \|\tilde{r}^{(i+1)}\|^2 \end{aligned}$$

which by Proposition 3

$$\geq g_m + \sum_{i=1}^{m-1} (\alpha \rho^{(i)})^2$$

Applying (28),

$$\begin{aligned} &\geq g_m + \sum_{i=1}^{m-1} \left( \frac{\alpha}{B^*} g_m \right)^2 \\ &= g_m + m \left( \frac{\alpha}{B^*} \right)^2 g_m \end{aligned}$$

Defining  $C = (\alpha/B^*)^2$

$$= g_m + C m g_m^2$$

Hence

$$\begin{aligned} g_m^2 + \frac{g_m}{Cm} &\leq \frac{g_0}{Cm} \\ g_m^2 + \frac{g_m}{Cm} + \frac{1}{(2Cm)^2} &\leq \frac{g_0}{Cm} + \frac{1}{(2Cm)^2} \\ \left( g_m + \frac{1}{2Cm} \right)^2 &\leq \frac{g_0}{Cm} + \frac{1}{(2Cm)^2} \leq \left( \sqrt{\frac{g_0}{Cm}} + \frac{1}{2Cm} \right)^2 \\ g_m + \frac{1}{2Cm} &\leq \sqrt{\frac{g_0}{Cm}} + \frac{1}{2Cm} \\ g_m &\leq \sqrt{\frac{g_0}{Cm}} = \sqrt{\frac{g_0 (B^*)^2}{\alpha^2 m}} = \frac{B^*}{\alpha} \frac{\sqrt{g_0}}{\sqrt{m}} \end{aligned}$$

The proof follows by noting that  $g_m \leq \frac{B^*}{\alpha} \frac{\sqrt{g_0}}{\sqrt{m}}$  holds for any choice of  $(w^*, \theta^*)$ .  $\square$
